# Supplementary material for: Theoretical Study of Copper Complexes: Molecular Structure, Properties, and Its Application to Solar Cells
Source: Hindawi journal article supplement (doi:10.1155/2013/613064), 2013-01-01

## SUPPLEMENTARY DATA

Optimized molecular structure, total energy and Infrared (IR) spectra for the copper complexes in presence of solvent (CuL4 and CuL6 in MeOH solution; CuL7, CuL8 and CuL9 in Chloroform Solution).

### 1 Molecular system: CuL4

#### *Optimized molecular structure*

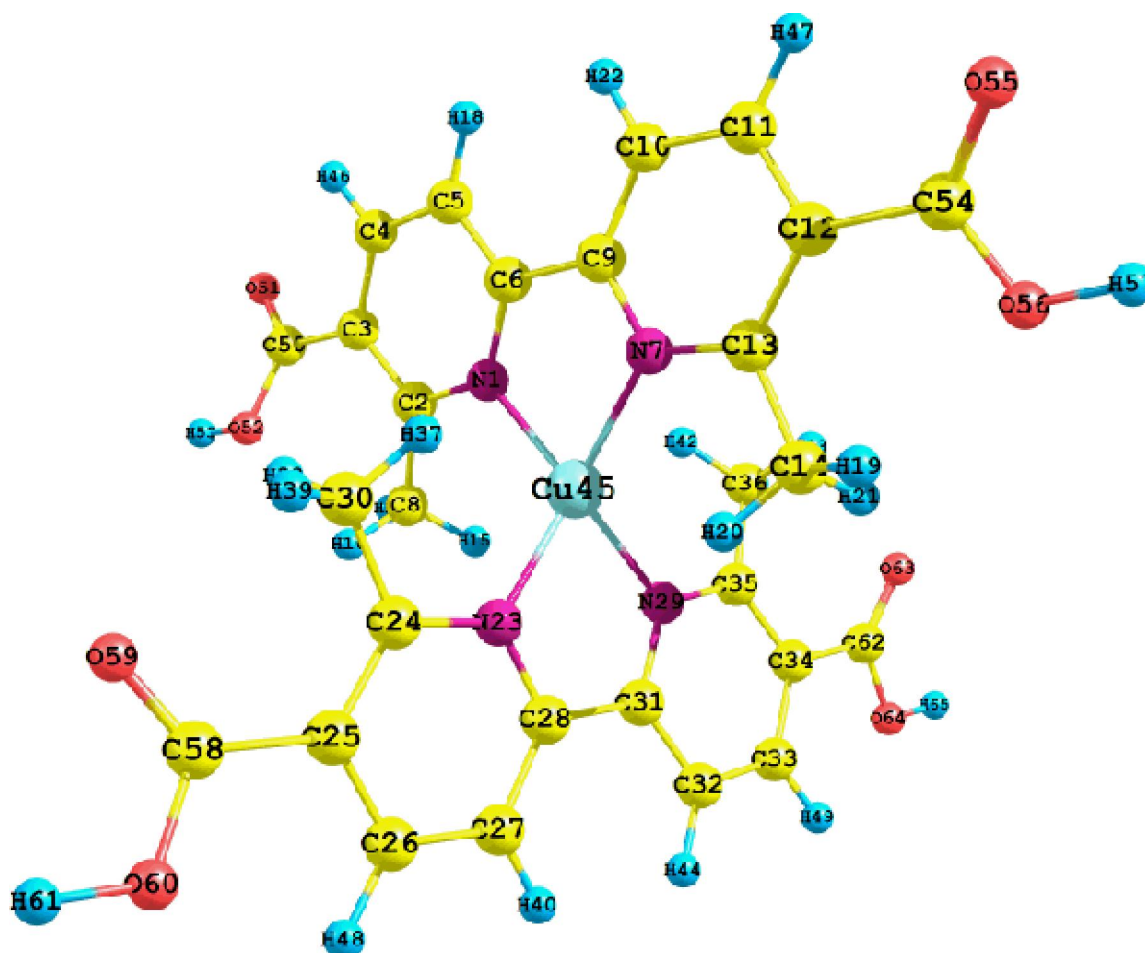

Geometrical parameters

| Center Number | Atomic Number | Coordinates (Angstroms) |           |           |
|---------------|---------------|-------------------------|-----------|-----------|
|               |               | X                       | Y         | Z         |
| 1             | 7             | -1.135542               | 1.454239  | -0.941666 |
| 2             | 6             | -2.199826               | 1.205754  | -1.746820 |
| 3             | 6             | -3.049182               | 2.274319  | -2.123579 |
| 4             | 6             | -2.739847               | 3.576222  | -1.693208 |
| 5             | 6             | -1.637339               | 3.805514  | -0.872356 |
| 6             | 6             | -0.853563               | 2.709434  | -0.496254 |
| 7             | 7             | 0.879882                | 1.657803  | 0.803759  |
| 8             | 6             | -2.358079               | -0.217542 | -2.189376 |
| 9             | 6             | 0.314456                | 2.829513  | 0.403228  |

|    |    |           |           |           |
|----|----|-----------|-----------|-----------|
| 10 | 6  | 0.817458  | 4.062084  | 0.833785  |
| 11 | 6  | 1.938872  | 4.064080  | 1.661673  |
| 12 | 6  | 2.543874  | 2.853579  | 2.040523  |
| 13 | 6  | 1.970412  | 1.632418  | 1.610510  |
| 14 | 6  | 2.457911  | 0.270709  | 2.005257  |
| 15 | 1  | -1.385826 | -0.723297 | -2.122194 |
| 16 | 1  | -3.064414 | -0.745233 | -1.532032 |
| 17 | 1  | -2.748545 | -0.287690 | -3.208236 |
| 18 | 1  | -1.406549 | 4.810950  | -0.528212 |
| 19 | 1  | 2.856671  | 0.258164  | 3.023575  |
| 20 | 1  | 1.630697  | -0.445654 | 1.917709  |
| 21 | 1  | 3.265133  | -0.056249 | 1.333927  |
| 22 | 1  | 0.357369  | 4.998696  | 0.527505  |
| 23 | 7  | -0.884063 | -1.556258 | 0.871863  |
| 24 | 6  | -1.996578 | -1.476462 | 1.643173  |
| 25 | 6  | -2.597985 | -2.665504 | 2.124531  |
| 26 | 6  | -2.005443 | -3.902777 | 1.819515  |
| 27 | 6  | -0.861467 | -3.956815 | 1.023827  |
| 28 | 6  | -0.325573 | -2.755086 | 0.548117  |
| 29 | 7  | 1.169100  | -1.469949 | -0.839065 |
| 30 | 6  | -2.494357 | -0.094905 | 1.939792  |
| 31 | 6  | 0.864918  | -2.696200 | -0.328639 |
| 32 | 6  | 1.643149  | -3.819155 | -0.627215 |
| 33 | 6  | 2.755386  | -3.654820 | -1.451520 |
| 34 | 6  | 3.077390  | -2.386283 | -1.964339 |
| 35 | 6  | 2.243276  | -1.284673 | -1.647070 |
| 36 | 6  | 2.447102  | 0.108285  | -2.159816 |
| 37 | 1  | -1.680662 | 0.623650  | 1.779337  |
| 38 | 1  | -3.322528 | 0.167873  | 1.265082  |
| 39 | 1  | -2.873457 | -0.009709 | 2.962809  |
| 40 | 1  | -0.411554 | -4.915176 | 0.775535  |
| 41 | 1  | 2.719619  | 0.112366  | -3.220227 |
| 42 | 1  | 1.526802  | 0.686742  | -2.009276 |
| 43 | 1  | 3.264691  | 0.605494  | -1.618758 |
| 44 | 1  | 1.400336  | -4.798695 | -0.222052 |
| 45 | 29 | 0.014934  | 0.021161  | -0.064294 |
| 46 | 1  | -3.380193 | 4.402584  | -1.998624 |
| 47 | 1  | 2.364668  | 5.003945  | 2.011115  |
| 48 | 1  | -2.453181 | -4.819607 | 2.196539  |
| 49 | 1  | 3.385219  | -4.507753 | -1.693061 |
| 50 | 6  | -4.264536 | 2.134637  | -2.968113 |
| 51 | 8  | -4.752402 | 3.083170  | -3.614251 |
| 52 | 8  | -4.827909 | 0.907149  | -2.943999 |
| 53 | 1  | -5.673944 | 0.854593  | -3.531639 |
| 54 | 6  | 3.759583  | 2.960728  | 2.889054  |
| 55 | 8  | 3.989332  | 3.941634  | 3.623504  |
| 56 | 8  | 4.623814  | 1.930478  | 2.760556  |
| 57 | 1  | 5.461852  | 2.049633  | 3.350540  |
| 58 | 6  | -3.849328 | -2.640580 | 2.922309  |
| 59 | 8  | -4.664018 | -1.699096 | 2.956020  |
| 60 | 8  | -4.039552 | -3.788145 | 3.620176  |
| 61 | 1  | -4.927056 | -3.783160 | 4.141836  |
| 62 | 6  | 4.289019  | -2.232434 | -2.808162 |
| 63 | 8  | 4.846333  | -1.153516 | -3.084936 |
| 64 | 8  | 4.762091  | -3.422877 | -3.256352 |
| 65 | 1  | 5.616406  | -3.311602 | -3.819589 |

---

**Total Energy: -3540.882399 Hartree**

***Infrared (IR) spectrum***

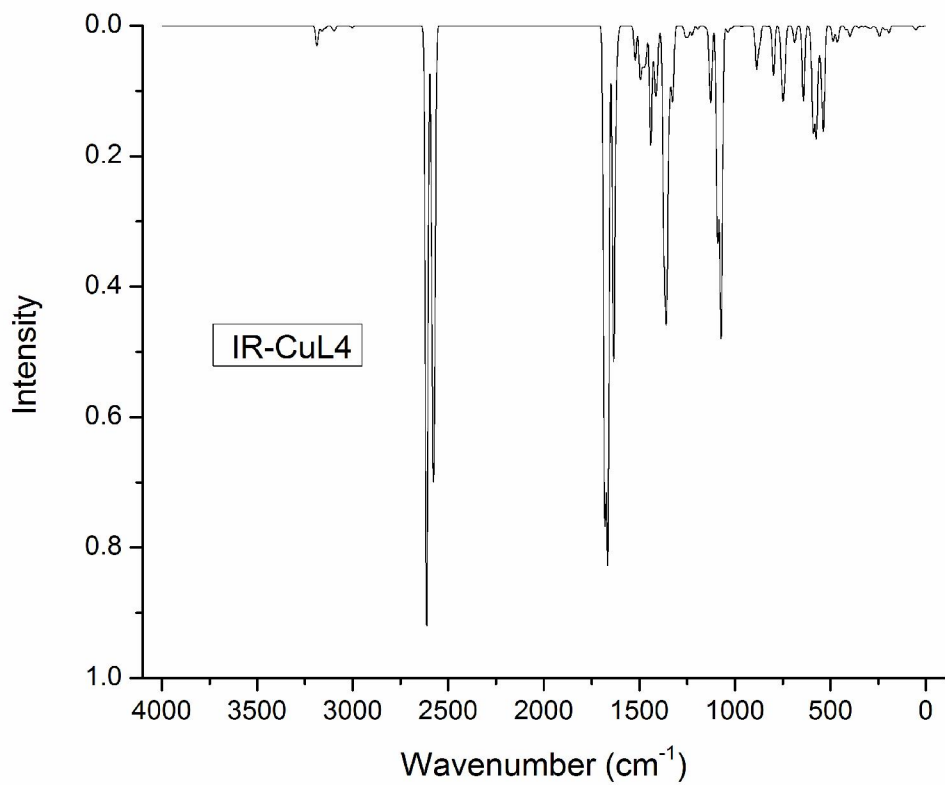

## 2 Molecular system: CuL6

### Optimized molecular structure

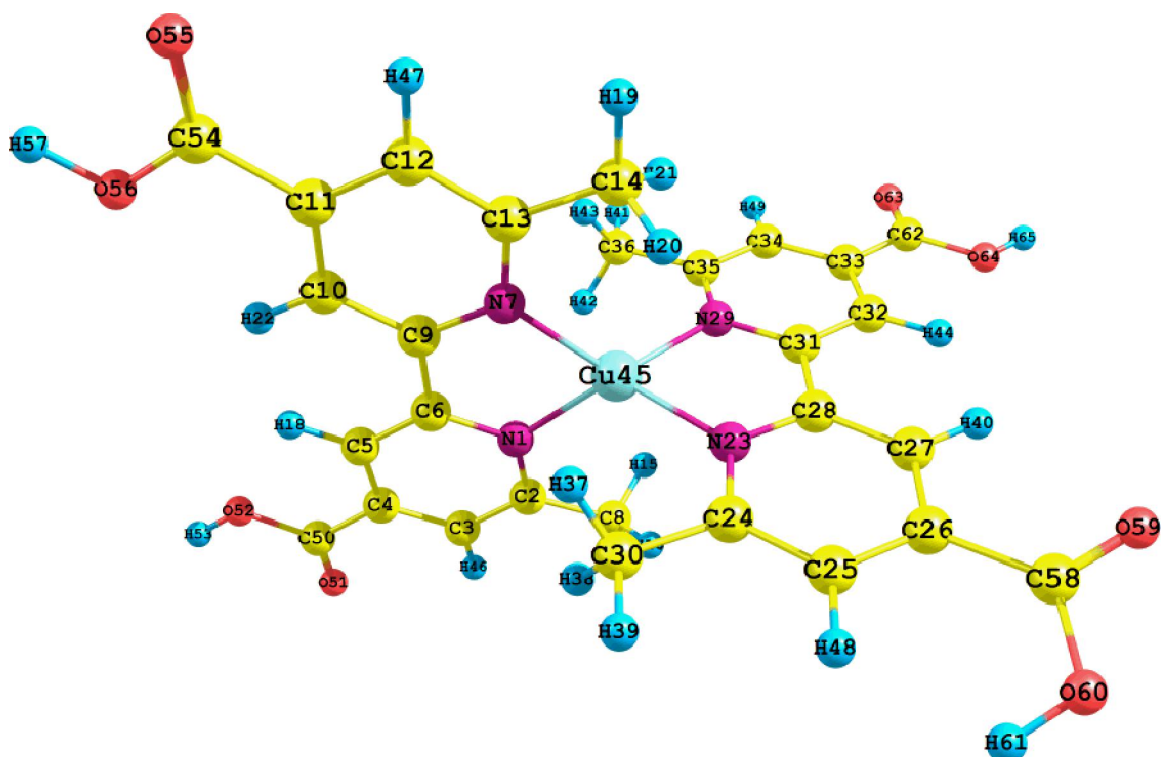

Geometrical parameters

| Center Number | Atomic Number | Coordinates (Angstroms) |           |           |
|---------------|---------------|-------------------------|-----------|-----------|
|               |               | X                       | Y         | Z         |
| 1             | 7             | 1.537505                | 0.867040  | 1.006772  |
| 2             | 6             | 1.426742                | 1.746022  | 2.033760  |
| 3             | 6             | 2.576004                | 2.263340  | 2.649756  |
| 4             | 6             | 3.838081                | 1.863833  | 2.191915  |
| 5             | 6             | 3.938650                | 0.957914  | 1.128609  |
| 6             | 6             | 2.759835                | 0.473022  | 0.553143  |
| 7             | 7             | 1.510672                | -0.855928 | -1.014585 |
| 8             | 6             | 0.043180                | 2.125378  | 2.459031  |
| 9             | 6             | 2.744694                | -0.486016 | -0.573070 |
| 10            | 6             | 3.908227                | -0.990860 | -1.162446 |
| 11            | 6             | 3.779753                | -1.889179 | -2.229323 |
| 12            | 6             | 2.505640                | -2.262439 | -2.675879 |
| 13            | 6             | 1.372684                | -1.728111 | -2.044042 |
| 14            | 6             | -0.022297               | -2.081669 | -2.454077 |
| 15            | 1             | -0.484761               | 2.621006  | 1.630497  |
| 16            | 1             | -0.533192               | 1.225232  | 2.719066  |
| 17            | 1             | 0.061444                | 2.799784  | 3.321376  |
| 18            | 1             | 4.917061                | 0.645650  | 0.769752  |
| 19            | 1             | -0.026366               | -2.750537 | -3.320895 |
| 20            | 1             | -0.547497               | -2.574229 | -1.621952 |
| 21            | 1             | -0.587117               | -1.170512 | -2.700747 |
| 22            | 1             | 4.895558                | -0.698126 | -0.811934 |
| 23            | 7             | -1.534935               | -0.997723 | 0.861759  |
| 24            | 6             | -1.410551               | -2.047086 | 1.709112  |
| 25            | 6             | -2.550728               | -2.701857 | 2.201804  |
| 26            | 6             | -3.821664               | -2.261933 | 1.809050  |

|    |    |           |           |           |
|----|----|-----------|-----------|-----------|
| 27 | 6  | -3.931217 | -1.174989 | 0.930669  |
| 28 | 6  | -2.764390 | -0.557332 | 0.473737  |
| 29 | 7  | -1.537234 | 1.041571  | -0.836200 |
| 30 | 6  | -0.021980 | -2.461545 | 2.081395  |
| 31 | 6  | -2.765743 | 0.594395  | -0.454622 |
| 32 | 6  | -3.936825 | 1.199859  | -0.921106 |
| 33 | 6  | -3.821480 | 2.288256  | -1.795222 |
| 34 | 6  | -2.553239 | 2.738135  | -2.183977 |
| 35 | 6  | -1.412293 | 2.090393  | -1.686875 |
| 36 | 6  | -0.023008 | 2.504307  | -2.057611 |
| 37 | 1  | 0.550794  | -2.718525 | 1.178049  |
| 38 | 1  | 0.501805  | -1.627234 | 2.571527  |
| 39 | 1  | -0.028640 | -3.323451 | 2.756594  |
| 40 | 1  | -4.917228 | -0.836043 | 0.616538  |
| 41 | 1  | -0.029882 | 3.367502  | -2.731117 |
| 42 | 1  | 0.550388  | 2.759294  | -1.154110 |
| 43 | 1  | 0.500499  | 1.671107  | -2.550108 |
| 44 | 1  | -4.920035 | 0.848003  | -0.616180 |
| 45 | 29 | -0.005594 | 0.020084  | 0.007085  |
| 46 | 1  | 2.484616  | 2.967830  | 3.475351  |
| 47 | 1  | 2.392650  | -2.960450 | -3.504341 |
| 48 | 1  | -2.415903 | -3.552352 | 2.872169  |
| 49 | 1  | -2.450754 | 3.582292  | -2.864517 |
| 50 | 6  | 5.050997  | 2.419187  | 2.852542  |
| 51 | 8  | 5.013587  | 3.217331  | 3.806442  |
| 52 | 8  | 6.200803  | 1.966596  | 2.307898  |
| 53 | 1  | 7.038361  | 2.352122  | 2.770101  |
| 54 | 6  | 4.974861  | -2.463241 | -2.906379 |
| 55 | 8  | 4.911977  | -3.248186 | -3.869892 |
| 56 | 8  | 6.138707  | -2.043934 | -2.364909 |
| 57 | 1  | 6.964077  | -2.441077 | -2.839122 |
| 58 | 6  | -5.090734 | -2.920678 | 2.254311  |
| 59 | 8  | -6.179106 | -2.690666 | 1.700998  |
| 60 | 8  | -5.057380 | -3.798860 | 3.281284  |
| 61 | 1  | -4.175727 | -3.921855 | 3.790213  |
| 62 | 6  | -5.024608 | 2.985937  | -2.326489 |
| 63 | 8  | -4.972318 | 3.965419  | -3.092231 |
| 64 | 8  | -6.182312 | 2.444532  | -1.891046 |
| 65 | 1  | -7.013182 | 2.931306  | -2.260537 |

-----

**Total Energy: -3541.0450193 Hartree**

***Infrared (IR) spectrum***

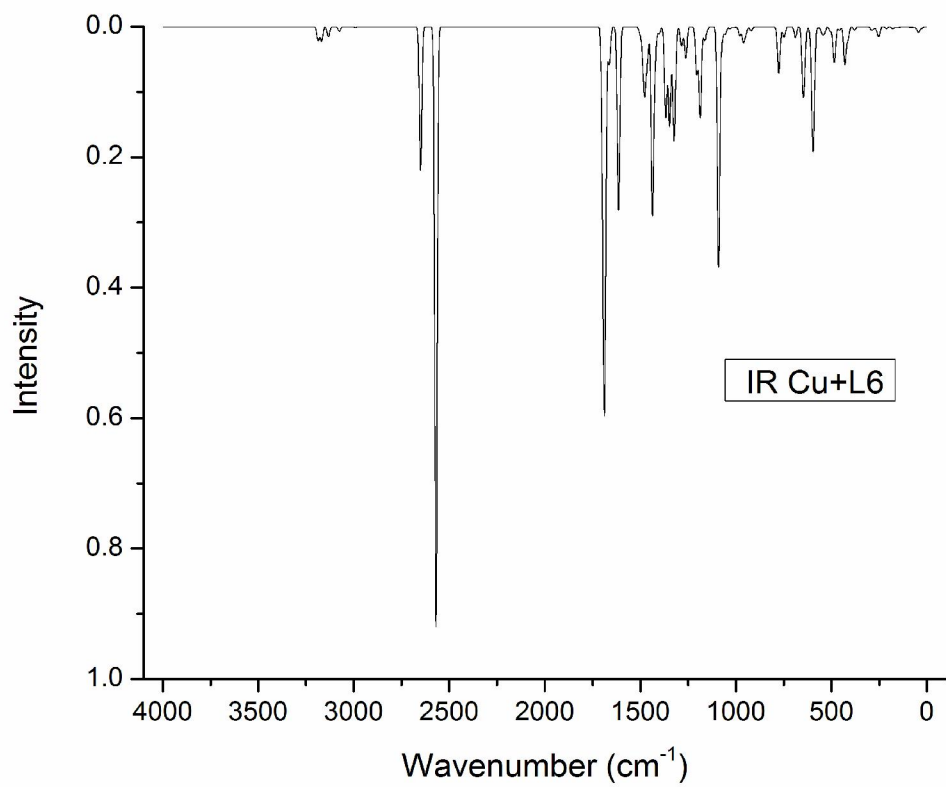

### 3 Molecular system: CuL7

#### Optimized molecular structure

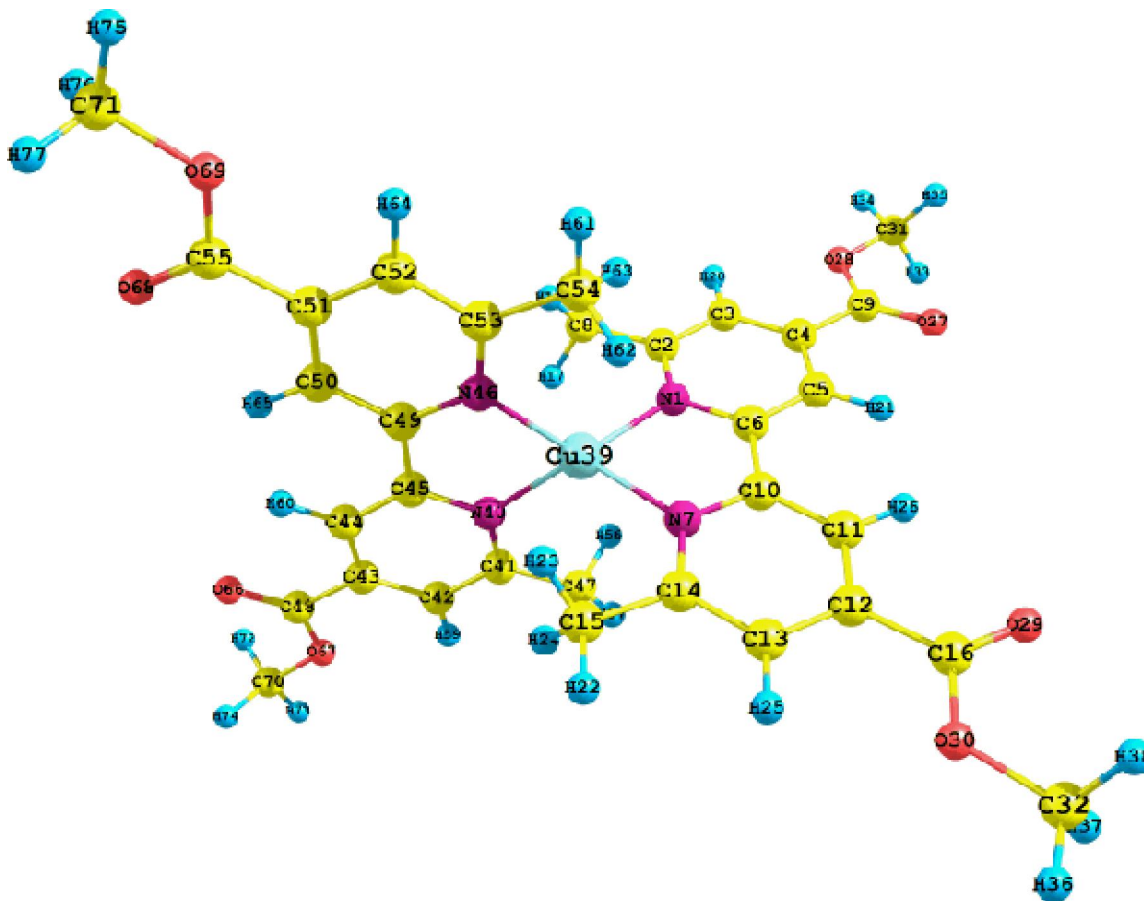

Geometrical parameters

| Center Number | Atomic Number | Coordinates (Angstroms) |           |           |
|---------------|---------------|-------------------------|-----------|-----------|
|               |               | X                       | Y         | Z         |
| 1             | 7             | -1.531527               | 0.950631  | 0.931062  |
| 2             | 6             | -1.411984               | 1.926229  | 1.865364  |
| 3             | 6             | -2.553431               | 2.530965  | 2.414258  |
| 4             | 6             | -3.819614               | 2.114967  | 1.984162  |
| 5             | 6             | -3.929115               | 1.105398  | 1.019840  |
| 6             | 6             | -2.759346               | 0.536452  | 0.509039  |
| 7             | 7             | -1.531726               | -0.950819 | -0.930907 |
| 8             | 6             | -0.023348               | 2.312812  | 2.269052  |
| 9             | 6             | -5.074852               | 2.711132  | 2.520040  |
| 10            | 6             | -2.759460               | -0.536486 | -0.508781 |
| 11            | 6             | -3.929344               | -1.105280 | -1.019491 |
| 12            | 6             | -3.820045               | -2.114851 | -1.983834 |
| 13            | 6             | -2.553948               | -2.530994 | -2.414049 |
| 14            | 6             | -1.412380               | -1.926412 | -1.865240 |
| 15            | 6             | -0.023825               | -2.313142 | -2.269059 |
| 16            | 6             | -5.075394               | -2.710879 | -2.519604 |
| 17            | 1             | 0.522381                | 1.432365  | 2.637162  |
| 18            | 1             | 0.531347                | 2.695678  | 1.400486  |
| 19            | 1             | -0.030901               | 3.079361  | 3.049740  |
| 20            | 1             | -2.450377               | 3.311736  | 3.163037  |

|    |    |           |           |           |
|----|----|-----------|-----------|-----------|
| 21 | 1  | -4.916337 | 0.787310  | 0.690271  |
| 22 | 1  | -0.031534 | -3.079780 | -3.049659 |
| 23 | 1  | 0.521919  | -1.432775 | -2.637343 |
| 24 | 1  | 0.530955  | -2.695942 | -1.400519 |
| 25 | 1  | -2.451053 | -3.311766 | -3.162850 |
| 26 | 1  | -4.916494 | -0.787073 | -0.689827 |
| 27 | 8  | -6.211611 | 2.363508  | 2.164314  |
| 28 | 8  | -4.838170 | 3.678460  | 3.439637  |
| 29 | 8  | -6.212088 | -2.363119 | -2.163801 |
| 30 | 8  | -4.838892 | -3.678228 | -3.439224 |
| 31 | 6  | -6.001642 | 4.344468  | 4.036229  |
| 32 | 6  | -6.002489 | -4.344103 | -4.035720 |
| 33 | 1  | -6.627490 | 3.607824  | 4.549951  |
| 34 | 1  | -5.588482 | 5.066743  | 4.740229  |
| 35 | 1  | -6.582196 | 4.844376  | 3.254344  |
| 36 | 1  | -5.589469 | -5.066425 | -4.739755 |
| 37 | 1  | -6.583036 | -4.843945 | -3.253787 |
| 38 | 1  | -6.628296 | -3.607387 | -4.549389 |
| 39 | 29 | 0.000001  | -0.000217 | -0.000031 |
| 40 | 7  | 1.531706  | -0.950795 | 0.930924  |
| 41 | 6  | 1.412338  | -1.926372 | 1.865271  |
| 42 | 6  | 2.553893  | -2.530989 | 2.414071  |
| 43 | 6  | 3.819998  | -2.114896 | 1.983833  |
| 44 | 6  | 3.929319  | -1.105348 | 1.019468  |
| 45 | 6  | 2.759448  | -0.536518 | 0.508769  |
| 46 | 7  | 1.531549  | 0.950563  | -0.931140 |
| 47 | 6  | 0.023775  | -2.313039 | 2.269124  |
| 48 | 6  | 5.075335  | -2.710937 | 2.519617  |
| 49 | 6  | 2.759359  | 0.536406  | -0.509065 |
| 50 | 6  | 3.929140  | 1.105370  | -1.019820 |
| 51 | 6  | 3.819660  | 2.114938  | -1.984146 |
| 52 | 6  | 2.553487  | 2.530917  | -2.414292 |
| 53 | 6  | 1.412028  | 1.926161  | -1.865445 |
| 54 | 6  | 0.023402  | 2.312720  | -2.269189 |
| 55 | 6  | 5.074909  | 2.711125  | -2.519973 |
| 56 | 1  | -0.521938 | -1.432633 | 2.637358  |
| 57 | 1  | -0.531025 | -2.695879 | 1.400615  |
| 58 | 1  | 0.031469  | -3.079628 | 3.049772  |
| 59 | 1  | 2.450980  | -3.311748 | 3.162882  |
| 60 | 1  | 4.916476  | -0.787180 | 0.689784  |
| 61 | 1  | 0.030975  | 3.079197  | -3.049948 |
| 62 | 1  | -0.522329 | 1.432243  | -2.637225 |
| 63 | 1  | -0.531303 | 2.695675  | -1.400670 |
| 64 | 1  | 2.450450  | 3.311690  | -3.163071 |
| 65 | 1  | 4.916353  | 0.787299  | -0.690209 |
| 66 | 8  | 6.212035  | -2.363267 | 2.163746  |
| 67 | 8  | 4.838815  | -3.678204 | 3.439321  |
| 68 | 8  | 6.211662  | 2.363491  | -2.164237 |
| 69 | 8  | 4.838246  | 3.678398  | -3.439634 |
| 70 | 6  | 6.002394  | -4.344094 | 4.035832  |
| 71 | 6  | 6.001730  | 4.344386  | -4.036224 |
| 72 | 1  | 6.628167  | -3.607392 | 4.549564  |
| 73 | 1  | 5.589353  | -5.066449 | 4.739819  |
| 74 | 1  | 6.582984  | -4.843893 | 3.253903  |
| 75 | 1  | 5.588583  | 5.066681  | -4.740210 |
| 76 | 1  | 6.582307  | 4.844265  | -3.254337 |
| 77 | 1  | 6.627552  | 3.607733  | -4.549965 |

-----

**Total Energy: -3698.0339625 Hartree**



*Infrared (IR) spectrum*

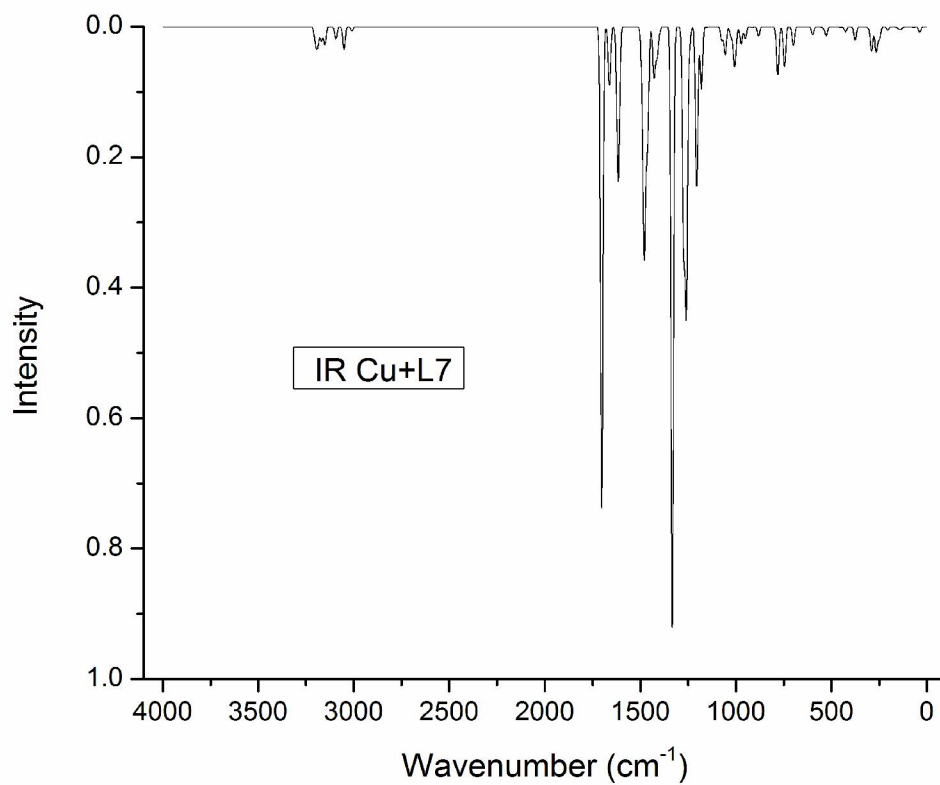

## 4 Molecular system: CuL8

### Optimized molecular structure

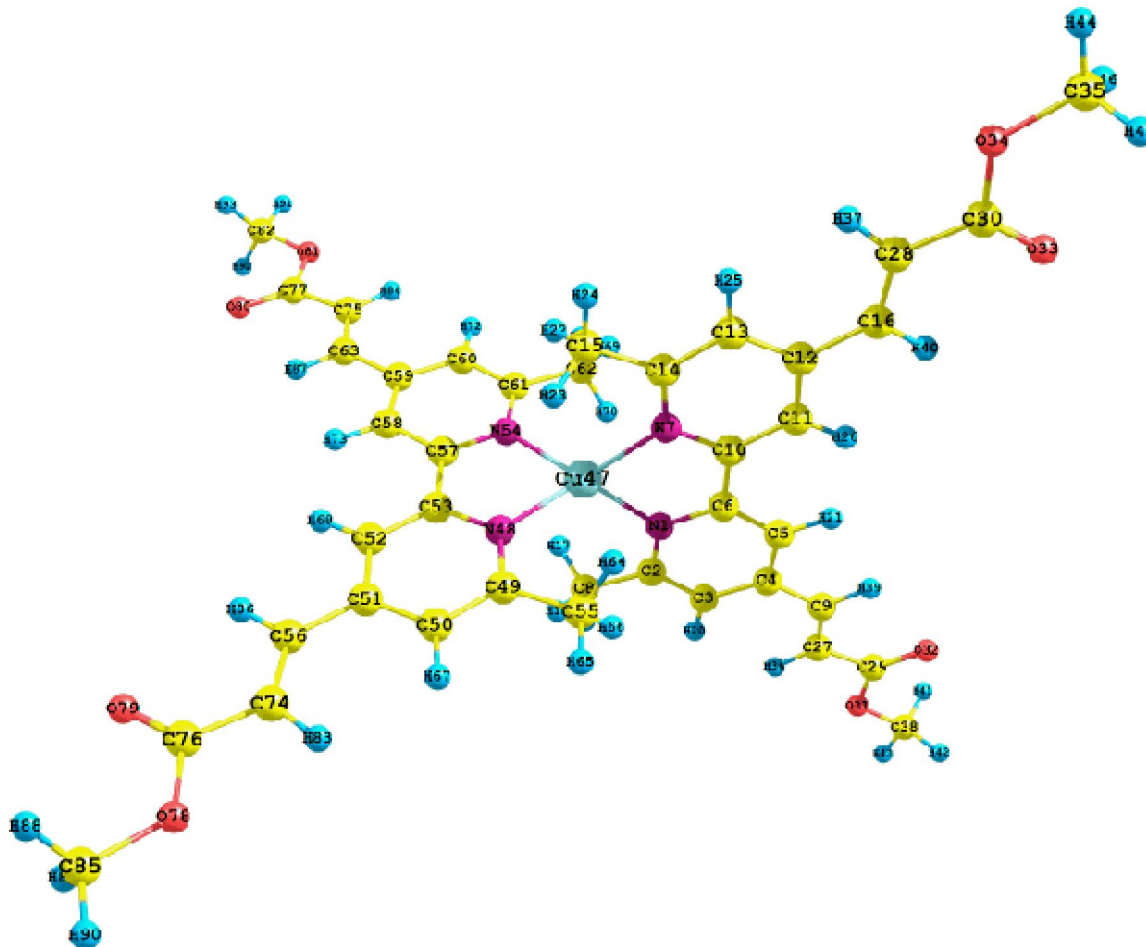

Geometrical parameters

| Center Number | Atomic Number | Coordinates (Angstroms) |           |           |
|---------------|---------------|-------------------------|-----------|-----------|
|               |               | X                       | Y         | Z         |
| 1             | 7             | 1.535054                | 0.949089  | 0.928709  |
| 2             | 6             | 1.422520                | 1.928953  | 1.863740  |
| 3             | 6             | 2.560679                | 2.533539  | 2.407960  |
| 4             | 6             | 3.842425                | 2.128187  | 1.986554  |
| 5             | 6             | 3.931817                | 1.109767  | 1.020451  |
| 6             | 6             | 2.763314                | 0.537501  | 0.509082  |
| 7             | 7             | 1.535423                | -0.949713 | -0.928370 |
| 8             | 6             | 0.033275                | 2.314581  | 2.268757  |
| 9             | 6             | 5.079458                | 2.714060  | 2.506843  |
| 10            | 6             | 2.763527                | -0.537779 | -0.508616 |
| 11            | 6             | 3.932245                | -1.109692 | -1.019892 |
| 12            | 6             | 3.843228                | -2.128093 | -1.986050 |
| 13            | 6             | 2.561639                | -2.533754 | -2.407639 |
| 14            | 6             | 1.423255                | -1.929531 | -1.863496 |
| 15            | 6             | 0.034160                | -2.315461 | -2.268727 |
| 16            | 6             | 5.080470                | -2.713640 | -2.506211 |
| 17            | 1             | -0.510211               | 1.433819  | 2.639392  |
| 18            | 1             | 0.039819                | 3.083413  | 3.047429  |
| 19            | 1             | -0.523362               | 2.693154  | 1.399580  |

|    |    |           |           |           |
|----|----|-----------|-----------|-----------|
| 20 | 1  | 2.435071  | 3.313623  | 3.156061  |
| 21 | 1  | 4.911767  | 0.780221  | 0.679933  |
| 22 | 1  | -0.522602 | -2.693973 | -1.399603 |
| 23 | 1  | -0.509394 | -1.434851 | -2.639630 |
| 24 | 1  | 0.040998  | -3.084422 | -3.047270 |
| 25 | 1  | 2.436334  | -3.313809 | -3.155822 |
| 26 | 1  | 4.912064  | -0.779887 | -0.679249 |
| 27 | 6  | 5.160074  | 3.715423  | 3.409158  |
| 28 | 6  | 5.161460  | -3.715168 | -3.408314 |
| 29 | 6  | 6.474545  | 4.211731  | 3.850697  |
| 30 | 6  | 6.476131  | -4.211095 | -3.849679 |
| 31 | 8  | 6.331611  | 5.229872  | 4.748487  |
| 32 | 8  | 7.583525  | 3.786226  | 3.478887  |
| 33 | 8  | 7.584930  | -3.784945 | -3.478068 |
| 34 | 8  | 6.333633  | -5.229667 | -4.747049 |
| 35 | 6  | 7.556006  | -5.832775 | -5.282942 |
| 36 | 1  | 4.289649  | 4.202899  | 3.850677  |
| 37 | 1  | 4.291215  | -4.203054 | -3.849737 |
| 38 | 6  | 7.553719  | 5.833343  | 5.284575  |
| 39 | 1  | 6.013957  | 2.296255  | 2.120610  |
| 40 | 1  | 6.014821  | -2.295467 | -2.120019 |
| 41 | 1  | 8.142295  | 5.077318  | 5.814594  |
| 42 | 1  | 8.149087  | 6.258424  | 4.469884  |
| 43 | 1  | 7.214318  | 6.612302  | 5.967578  |
| 44 | 1  | 7.216963  | -6.612525 | -5.965217 |
| 45 | 1  | 8.143935  | -5.076786 | -5.813732 |
| 46 | 1  | 8.151880  | -6.256774 | -4.468057 |
| 47 | 29 | 0.000001  | -0.000561 | 0.000004  |
| 48 | 7  | -1.535052 | 0.949091  | -0.928706 |
| 49 | 6  | -1.422518 | 1.928951  | -1.863742 |
| 50 | 6  | -2.560676 | 2.533531  | -2.407970 |
| 51 | 6  | -3.842422 | 2.128178  | -1.986566 |
| 52 | 6  | -3.931814 | 1.109761  | -1.020460 |
| 53 | 6  | -2.763312 | 0.537501  | -0.509083 |
| 54 | 7  | -1.535424 | -0.949714 | 0.928370  |
| 55 | 6  | -0.033272 | 2.314577  | -2.268758 |
| 56 | 6  | -5.079455 | 2.714044  | -2.506862 |
| 57 | 6  | -2.763527 | -0.537779 | 0.508615  |
| 58 | 6  | -3.932245 | -1.109691 | 1.019891  |
| 59 | 6  | -3.843230 | -2.128091 | 1.986049  |
| 60 | 6  | -2.561641 | -2.533755 | 2.407637  |
| 61 | 6  | -1.423257 | -1.929532 | 1.863496  |
| 62 | 6  | -0.034162 | -2.315461 | 2.268730  |
| 63 | 6  | -5.080472 | -2.713636 | 2.506213  |
| 64 | 1  | 0.510204  | 1.433820  | -2.639417 |
| 65 | 1  | -0.039815 | 3.083429  | -3.047411 |
| 66 | 1  | 0.523374  | 2.693125  | -1.399575 |
| 67 | 1  | -2.435067 | 3.313609  | -3.156076 |
| 68 | 1  | -4.911765 | 0.780213  | -0.679944 |
| 69 | 1  | 0.522612  | -2.693947 | 1.399604  |
| 70 | 1  | 0.509379  | -1.434853 | 2.639660  |
| 71 | 1  | -0.041000 | -3.084440 | 3.047256  |
| 72 | 1  | -2.436336 | -3.313814 | 3.155817  |
| 73 | 1  | -4.912064 | -0.779885 | 0.679249  |
| 74 | 6  | -5.160071 | 3.715425  | -3.409158 |
| 75 | 6  | -5.161464 | -3.715148 | 3.408333  |
| 76 | 6  | -6.474541 | 4.211724  | -3.850707 |
| 77 | 6  | -6.476136 | -4.211073 | 3.849697  |
| 78 | 8  | -6.331608 | 5.229881  | -4.748480 |
| 79 | 8  | -7.583521 | 3.786193  | -3.478927 |
| 80 | 8  | -7.584935 | -3.784930 | 3.478075  |
| 81 | 8  | -6.333640 | -5.229642 | 4.747070  |
| 82 | 6  | -7.556016 | -5.832749 | 5.282958  |
| 83 | 1  | -4.289645 | 4.202923  | -3.850653 |
| 84 | 1  | -4.291219 | -4.203021 | 3.849772  |
| 85 | 6  | -7.553716 | 5.833338  | -5.284582 |
| 86 | 1  | -6.013954 | 2.296221  | -2.120650 |
| 87 | 1  | -6.014822 | -2.295474 | 2.120006  |
| 88 | 1  | -8.142269 | 5.077311  | -5.814623 |
| 89 | 1  | -8.149107 | 6.258397  | -4.469896 |
| 90 | 1  | -7.214316 | 6.612313  | -5.967567 |

|    |   |           |           |          |
|----|---|-----------|-----------|----------|
| 91 | 1 | -7.216977 | -6.612519 | 5.965213 |
| 92 | 1 | -8.143933 | -5.076766 | 5.813770 |
| 93 | 1 | -8.151902 | -6.256723 | 4.468068 |

---

**Total Energy: -4007.3727181 Hartree**

**Infrared (IR) spectrum**

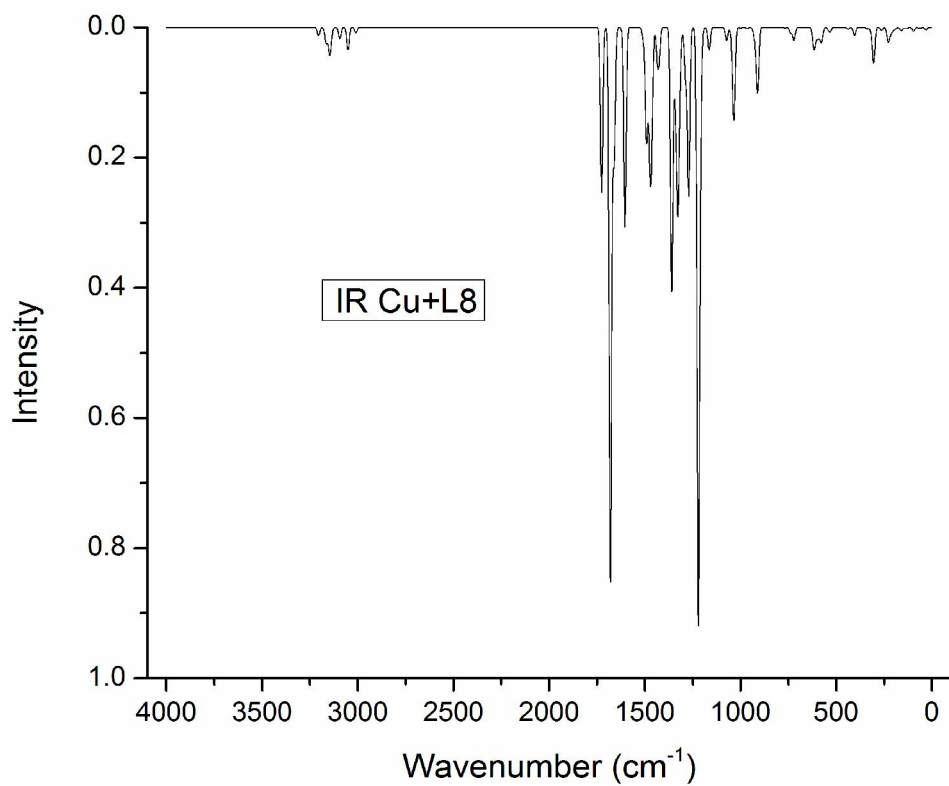

## 5 Molecular system: CuL9

### Optimized molecular structure

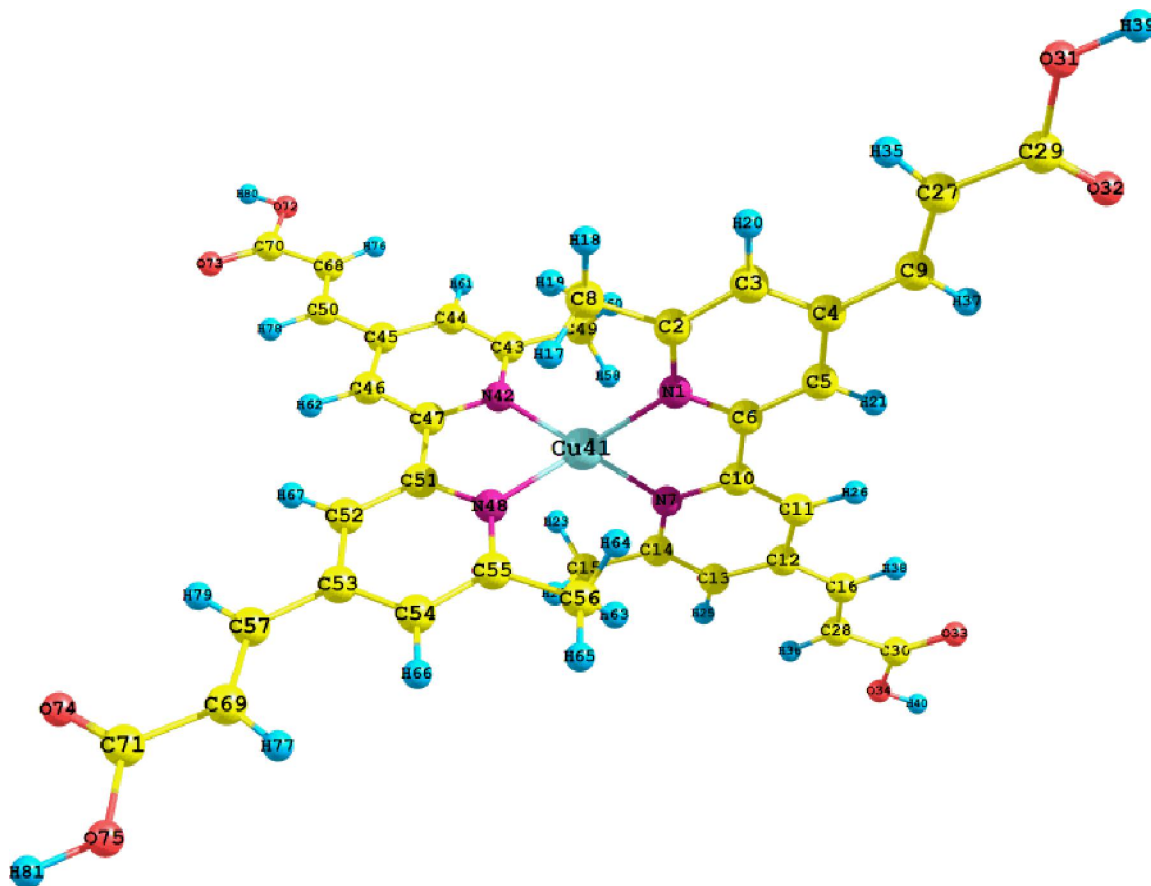

Geometrical parameters

| Center Number | Atomic Number | Coordinates (Angstroms) |           |           |
|---------------|---------------|-------------------------|-----------|-----------|
|               |               | X                       | Y         | Z         |
| 1             | 7             | 1.534828                | -0.950002 | -0.929030 |
| 2             | 6             | 1.423311                | -1.930475 | -1.863652 |
| 3             | 6             | 2.562217                | -2.535550 | -2.406443 |
| 4             | 6             | 3.843051                | -2.129908 | -1.982973 |
| 5             | 6             | 3.931398                | -1.111205 | -1.017216 |
| 6             | 6             | 2.762498                | -0.538053 | -0.508203 |
| 7             | 7             | 1.534707                | 0.949807  | 0.929166  |
| 8             | 6             | 0.034463                | -2.316456 | -2.269488 |
| 9             | 6             | 5.082074                | -2.714878 | -2.498699 |
| 10            | 6             | 2.762427                | 0.538048  | 0.508305  |
| 11            | 6             | 3.931253                | 1.111353  | 1.017327  |
| 12            | 6             | 3.842771                | 2.130010  | 1.983115  |
| 13            | 6             | 2.561885                | 2.535446  | 2.406623  |
| 14            | 6             | 1.423055                | 1.930227  | 1.863830  |
| 15            | 6             | 0.034166                | 2.316005  | 2.269715  |
| 16            | 6             | 5.081727                | 2.715113  | 2.498871  |
| 17            | 1             | -0.508858               | -1.435892 | -2.640830 |
| 18            | 1             | 0.041581                | -3.085599 | -3.047824 |
| 19            | 1             | -0.522618               | -2.694789 | -1.400481 |
| 20            | 1             | 2.437646                | -3.316482 | -3.153845 |
| 21            | 1             | 4.911046                | -0.782314 | -0.675280 |

|    |    |           |           |           |
|----|----|-----------|-----------|-----------|
| 22 | 1  | -0.522781 | 2.694989  | 1.400907  |
| 23 | 1  | -0.509253 | 1.435233  | 2.640405  |
| 24 | 1  | 0.041222  | 3.084638  | 3.048561  |
| 25 | 1  | 2.437214  | 3.316323  | 3.154068  |
| 26 | 1  | 4.910936  | 0.782610  | 0.675346  |
| 27 | 6  | 5.171235  | -3.709602 | -3.407788 |
| 28 | 6  | 5.170740  | 3.709731  | 3.408094  |
| 29 | 6  | 6.493086  | -4.197883 | -3.835224 |
| 30 | 6  | 6.492497  | 4.198176  | 3.835586  |
| 31 | 8  | 6.384352  | -5.204640 | -4.748387 |
| 32 | 8  | 7.593139  | -3.771137 | -3.436939 |
| 33 | 8  | 7.592624  | 3.771650  | 3.437274  |
| 34 | 8  | 6.383593  | 5.204837  | 4.748849  |
| 35 | 1  | 4.306681  | -4.194354 | -3.863216 |
| 36 | 1  | 4.306083  | 4.194250  | 3.863569  |
| 37 | 1  | 6.014285  | -2.301134 | -2.102552 |
| 38 | 1  | 6.013979  | 2.301551  | 2.102637  |
| 39 | 1  | 7.284629  | -5.547028 | -5.046413 |
| 40 | 1  | 7.283816  | 5.547320  | 5.046928  |
| 41 | 29 | -0.000002 | -0.000073 | -0.000028 |
| 42 | 7  | -1.534810 | -0.950057 | 0.928961  |
| 43 | 6  | -1.423273 | -1.930536 | 1.863574  |
| 44 | 6  | -2.562168 | -2.535616 | 2.406384  |
| 45 | 6  | -3.843012 | -2.129969 | 1.982948  |
| 46 | 6  | -3.931379 | -1.111253 | 1.017207  |
| 47 | 6  | -2.762490 | -0.538099 | 0.508171  |
| 48 | 7  | -1.534732 | 0.949812  | -0.929170 |
| 49 | 6  | -0.034417 | -2.316502 | 2.269395  |
| 50 | 6  | -5.082022 | -2.714948 | 2.498694  |
| 51 | 6  | -2.762443 | 0.538020  | -0.508318 |
| 52 | 6  | -3.931281 | 1.111309  | -1.017330 |
| 53 | 6  | -3.842818 | 2.129991  | -1.983094 |
| 54 | 6  | -2.561939 | 2.535463  | -2.406592 |
| 55 | 6  | -1.423097 | 1.930253  | -1.863815 |
| 56 | 6  | -0.034216 | 2.316054  | -2.269704 |
| 57 | 6  | -5.081785 | 2.715079  | -2.498840 |
| 58 | 1  | 0.508829  | -1.435970 | 2.640922  |
| 59 | 1  | -0.041516 | -3.085785 | 3.047594  |
| 60 | 1  | 0.522727  | -2.694637 | 1.400343  |
| 61 | 1  | -2.437579 | -3.316556 | 3.153776  |
| 62 | 1  | -4.911035 | -0.782352 | 0.675301  |
| 63 | 1  | 0.522743  | 2.695003  | -1.400889 |
| 64 | 1  | 0.509199  | 1.435298  | -2.640440 |
| 65 | 1  | -0.041287 | 3.084718  | -3.048520 |
| 66 | 1  | -2.437285 | 3.316357  | -3.154021 |
| 67 | 1  | -4.910958 | 0.782532  | -0.675363 |
| 68 | 6  | -5.171157 | -3.709698 | 3.407757  |
| 69 | 6  | -5.170815 | 3.709748  | -3.408006 |
| 70 | 6  | -6.492993 | -4.197994 | 3.835222  |
| 71 | 6  | -6.492580 | 4.198175  | -3.835495 |
| 72 | 8  | -6.384222 | -5.204786 | 4.748343  |
| 73 | 8  | -7.593062 | -3.771219 | 3.437011  |
| 74 | 8  | -7.592702 | 3.771553  | -3.437275 |
| 75 | 8  | -6.383686 | 5.204929  | -4.748659 |
| 76 | 1  | -4.306590 | -4.194464 | 3.863143  |
| 77 | 1  | -4.306166 | 4.194325  | -3.863433 |
| 78 | 1  | -6.014243 | -2.301191 | 2.102585  |
| 79 | 1  | -6.014029 | 2.301463  | -2.102643 |
| 80 | 1  | -7.284488 | -5.547181 | 5.046397  |
| 81 | 1  | -7.283914 | 5.547392  | -5.046744 |

---

**Total Energy: -3850.3478754 Hartree**

***Infrared (IR) spectrum***

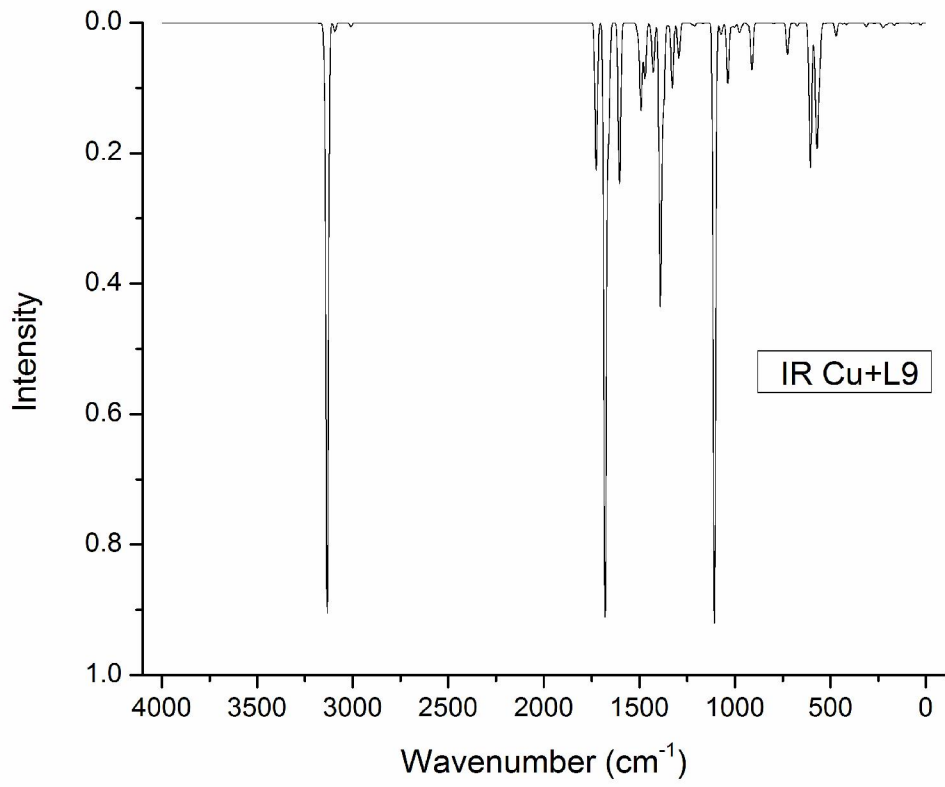

Supplement: f1 [file 613064.f1.pdf]
